# Supplementary material for: Highly efficient sulfonated-polystyrene–Cu(II)@Cu3(BTC)2 core–shell microsphere catalysts for base-free aerobic oxidation of alcohols
Source: Royal Society of Chemistry journal article supplement (doi:10.1039/c4ta06046f), 2015-01-01
Supplement: c4ta06046f1.pdf [file c4ta06046f1.pdf]

**Highly Efficient Sulfonated-Polystyrene-Cu(II)@Cu<sub>3</sub>(BTC)<sub>2</sub> Core-Shell  
Microsphere Catalysts for Base-Free Aerobic Oxidation of Alcohols**

Xiaowei Zhang, Wenjun Dong, Yi Luan, Mu Yang, Li Tan, Yangguang Guo, Hongyi  
Gao, Yinhai Tang, Rui Dang, Jie Li and Ge Wang\*

School of Materials Science and Engineering, University of Science and Technology  
Beijing, Beijing 100083, China. Fax: +86-10-62327878; Tel: +86-10-62333765; E-mail:  
gewang@mater.ustb.edu.cn

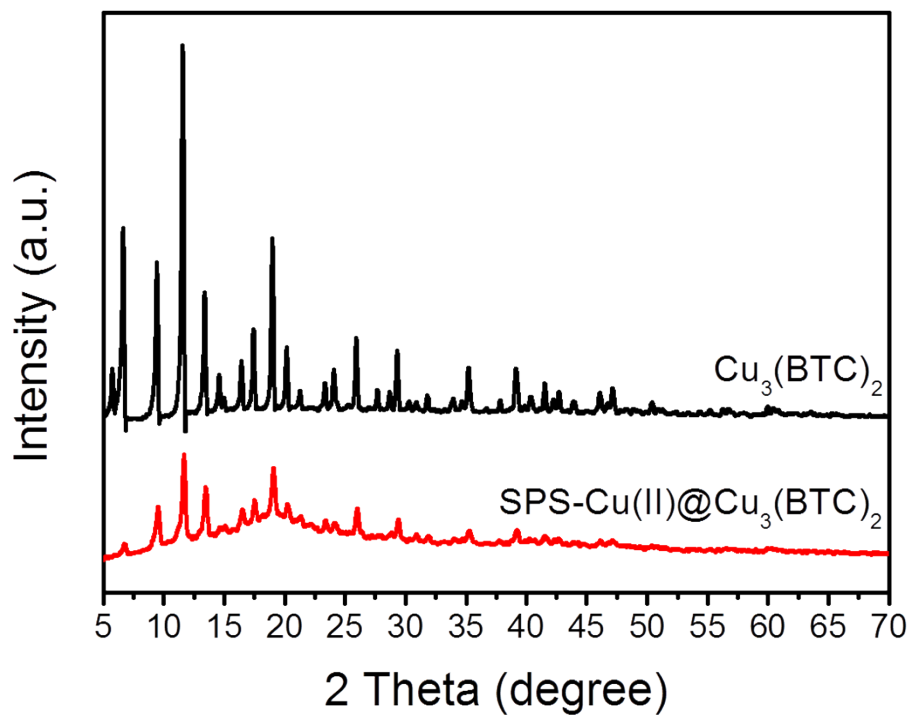

**Fig. S1** Powder XRD patterns of the as prepared  $\text{Cu}_3(\text{BTC})_2$  and  $\text{SPS-Cu(II)@Cu}_3(\text{BTC})_2$  nanoparticles.

Powder XRD patterns of the as prepared  $\text{Cu}_3(\text{BTC})_2$  and  $\text{SPS-Cu(II)@Cu}_3(\text{BTC})_2$  nanoparticles are indexed on the basis of a face-centered cubic unit cell with refined cell = 26.31918 (0.004868) Å and 26.35236 (0.002407) Å, respectively. The unit cell parameters match well with the reported HKUST-1 crystal structure<sup>1</sup>, which has a secondary building unit of paddle-wheel type metal corners connected with bytrimesic acid linkers. The 3D unit cell crystal framework of these two kinds of  $\text{Cu}_3(\text{BTC})_2$  is composed of large central cavities (diameter 0.9 nm) surrounded by small pockets (diameter 0.5 nm). The XRD peak intensity of the  $\text{SPS-Cu(II)@Cu}_3(\text{BTC})_2$  nanoparticles is weaker than that of the pure  $\text{Cu}_3(\text{BTC})_2$  sample, which is attributed to the presence of the SPS template.

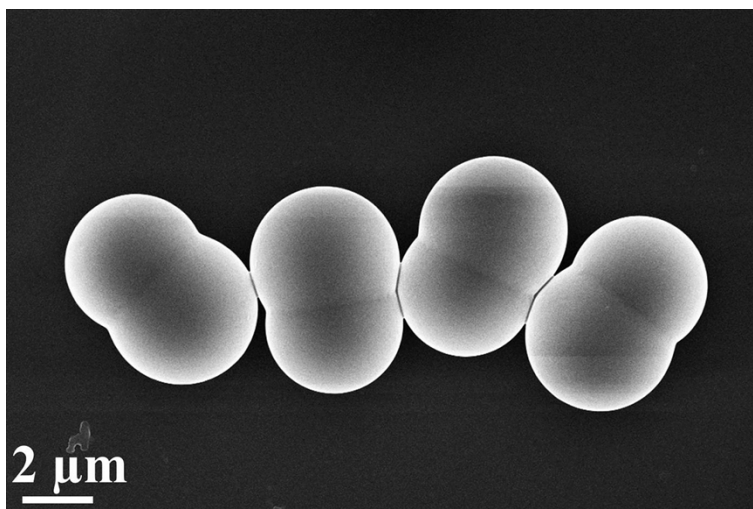

**Fig. S2** FESEM image of the PS microspheres before sulfonation.

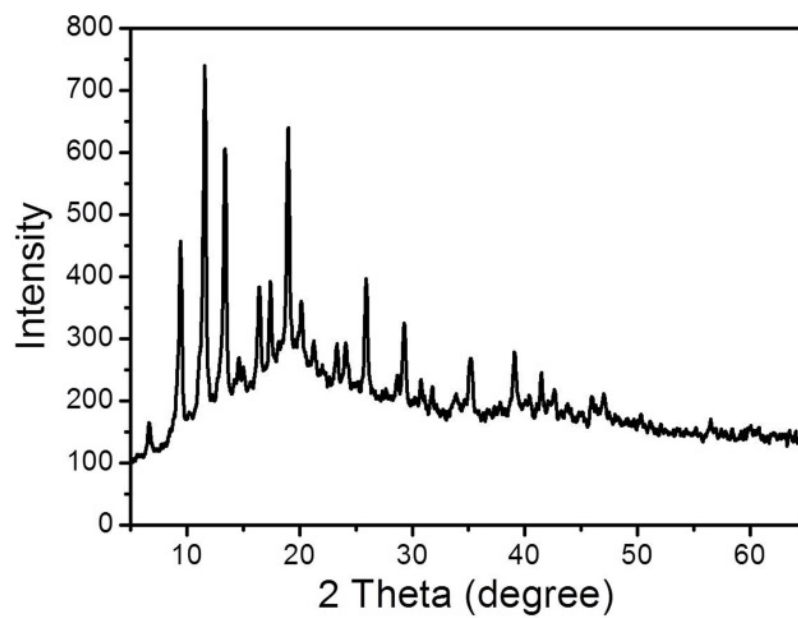

**Fig. S3** Powder XRD patterns of the SPS-Cu(II)@Cu<sub>3</sub>(BTC)<sub>2</sub> catalyst after 10 runs of aerobic oxidation of benzyl alcohol under base-free conditions.

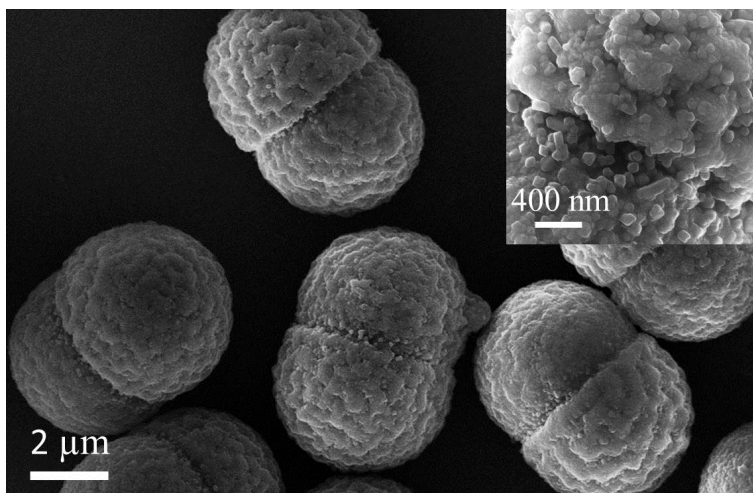

**Fig. S4** FESEM photograph of the SPS-Cu(II)@Cu<sub>3</sub>(BTC)<sub>2</sub> catalyst after 10 runs of aerobic oxidation of benzyl alcohol under base-free conditions.

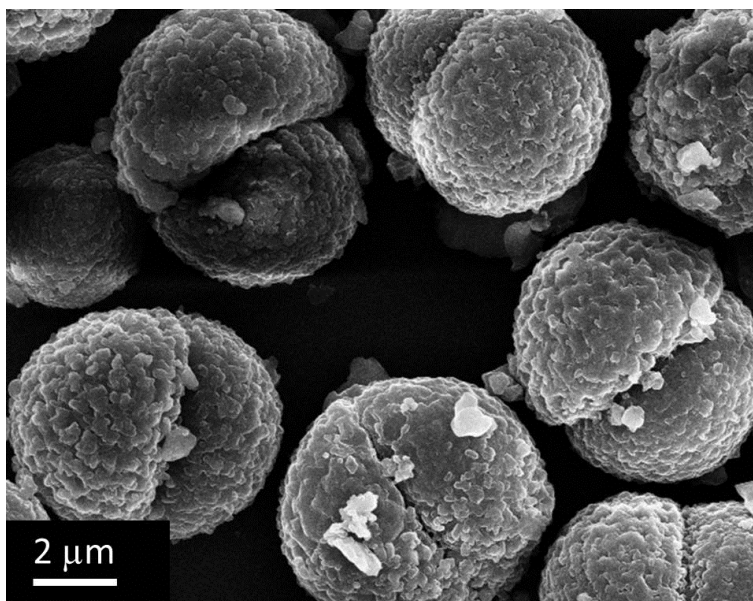

**Fig. S5** FESEM image of SPS-Cu(II)@Cu<sub>3</sub>(BTC)<sub>2</sub> composite after 18 catalytic reaction cycles of aerobic oxidation of benzyl alcohol under base-free conditions.

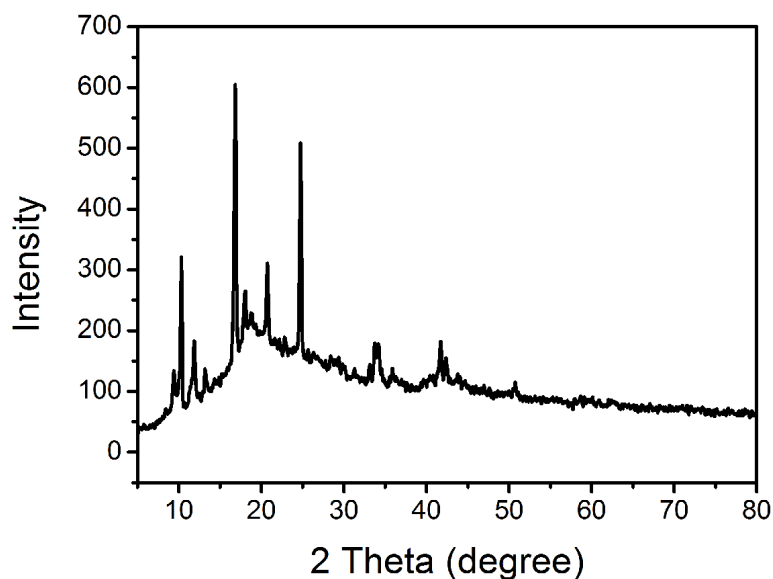

**Fig. S6** Powder XRD patterns of the SPS-Cu(II)@CuBDC composite.

The crystalline nature and chemical composition of the as-prepared SPS-Cu(II)@CuBDC product were confirmed by powder XRD. As shown in Figure S6, a broad diffraction peak at around  $2\theta = 20.0^\circ$  can be observed, which is attributable to the SPS template. Other relatively high peaks can be indexed as the crystallographic planes of the CuBDC with a layered crystalline structure.<sup>2</sup>

## References

1. S. S. Y. Chui, S. M. F. Lo, J. P. H. Charmant, A. G. Orpen and L. D. A Williams, *Science*, 1999, **283**, 1148-1150.
2. R. Adams, C. Carson, J. Ward, R. Tannenbaum and W. Koros, *Micropor. Mesopor. Mater.* 2010, **131**, 13-20.
